# Supplementary material for: An estrogen-sensitive hypothalamus-midbrain neural circuit controls thermogenesis and physical activity
Source: PubMed Central journal article supplement — Sci Adv. 2022 Jan 19;8(3):eabk0185. doi: 10.1126/sciadv.abk0185 (PMC8769556; doi:10.1126/sciadv.abk0185), 2022-01-19
Supplement: sciadv.abk0185_sm.pdf [file sciadv.abk0185_sm.pdf]

Supplementary Materials for

**An estrogen-sensitive hypothalamus-midbrain neural circuit controls thermogenesis and physical activity**

Hui Ye, Bing Feng, Chunmei Wang, Kenji Saito, Yongjie Yang, Lucas Ibrahim, Sarah Schaul, Nirali Patel, Leslie Saenz, Pei Luo, Penghua Lai, Valeria Torres, Maya Kota, Devin Dixit, Xing Cai, Na Qu, Ilirjana Hyseni, Kaifan Yu, Yuwei Jiang, Qingchun Tong, Zheng Sun, Benjamin R. Arenkiel, Yanlin He\*, Pingwen Xu\*, Yong Xu\*

\*Corresponding author. Email: yongx@bcm.edu (Y.X.); pingwenx@uic.edu (P.X.); yanlin.he@pbrc.edu (Y.H.)

Published 19 January 2022, *Sci. Adv.* **8**, eabk0185 (2022)  
DOI: 10.1126/sciadv.abk0185

**This PDF file includes:**

Figs. S1 to S10  
Key Resources Table

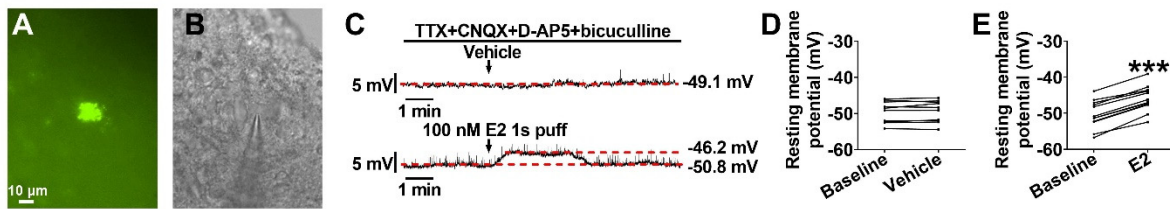

**Figure S1** (Related to Figure 1). **E2 directly depolarizes ER $\alpha$ <sup>vIVMH</sup> neurons.** **(A-B)** Micrographic images showing a recorded ER $\alpha$ -ZsGreen (+) neurons in the vIVMH of female mice. Left panel (A): the neuron visualized under the green fluorescence microscope; right panel (B): the same neuron patch clamped by a micropipette visualized under the brightfield microscope. Scale bar = 10  $\mu$ m. **(C)** Representative resting membrane potential traces before and after vehicle or E2 treatment (100 nM, 1s puff) after pre-incubation of presynaptic inhibitors 1 $\mu$ M TTX (a voltage-gated sodium channel blocker) + 30 $\mu$ M CNQX (an AMPA receptor antagonist) + 30 $\mu$ M AP-5 (an NMDA receptor antagonist) + 50 $\mu$ M bicuculline (a GABA<sub>A</sub> receptor antagonist) in ZsGreen (+) cells. **(D-E)** Summary of resting membrane potential before and after vehicle (D) or E2 (E) treatment (n=10 or 12). (D-E) Data are presented for each cell. \*\*\*, P < 0.001 in paired t-tests.

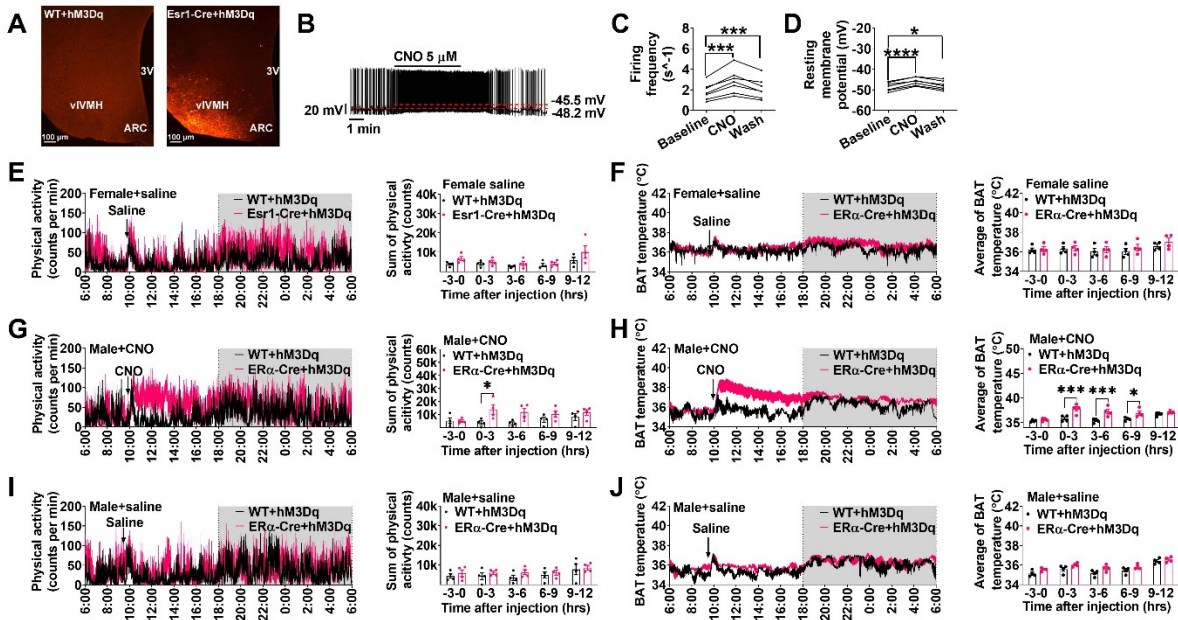

**Figure S2 (Related to Figure 1). Chemogenetic activation of ER $\alpha^{vIVMH}$  neurons stimulates physical activity and BAT thermogenesis in males. (A)** Immunofluorescence staining for mCherry in the vIVMH of WT + hM3Dq and Esr1-Cre + hM3Dq female mice. **(B)** Representative traces before and after CNO treatment (5  $\mu$ M) from mCherry (+) cells in the vIVMH of Esr1-Cre + hM3Dq female mice. **(C-D)** Summary of firing frequency (C) and resting membrane potential (D) before and after CNO treatment (n = 7). **(E)** Effects of saline i.p. injection on physical activity during 24-hrs recording (left panel) and sum of physical activity from 3 hours before to 12 hours after injection (right panel) in female WT + hM3Dq or Esr1-Cre + hM3Dq mice with emitter implanted under BAT (n = 4 or 4). **(F)** Effects of saline injection on BAT temperature during 24-hrs recording (left panel) and average of BAT temperature from 3 hours before to 12 hours after injection (right panel) in female WT + hM3Dq or Esr1-Cre + hM3Dq mice (n = 4 or 4). **(G)** Effects of CNO injection on physical activity during 24-hrs recording (left panel) and sum of physical activity from 3 hours before to 12 hours after injection (right panel) in male WT + hM3Dq or Esr1-Cre + hM3Dq mice with emitter implanted under BAT (n = 4 or 4). **(H)** Effects of CNO injection on BAT temperature during 24-hrs recording (left panel) and average of BAT temperature from 3 hours before to 12 hours after injection (right panel) in male WT + hM3Dq or Esr1-Cre + hM3Dq mice (n = 4 or 4). **(I)** Effects of saline i.p. injection on physical activity during 24-hrs recording (left panel) and sum of physical activity from 3 hours before to 12 hours after injection (right panel) in male WT + hM3Dq or Esr1-Cre + hM3Dq mice with emitter implanted under BAT (n = 4 or 4). **(J)** Effects of saline injection on BAT temperature during 24-hrs recording (left panel) and average of BAT temperature from 3 hours before to 12 hours after injection (right panel) in male WT + hM3Dq or Esr1-Cre + hM3Dq mice (n = 4 or 4). (C-D) Data are presented for each cell. \*\*, P < 0.01, \*\*\*, P < 0.001 in repeated-measures ANOVA analysis followed by post hoc Dunnett tests. (E-J) Results are shown as mean  $\pm$  SEM. \*, P < 0.05 \*\*\*, P < 0.001 in two way ANOVA analysis followed by post hoc Sidak tests.

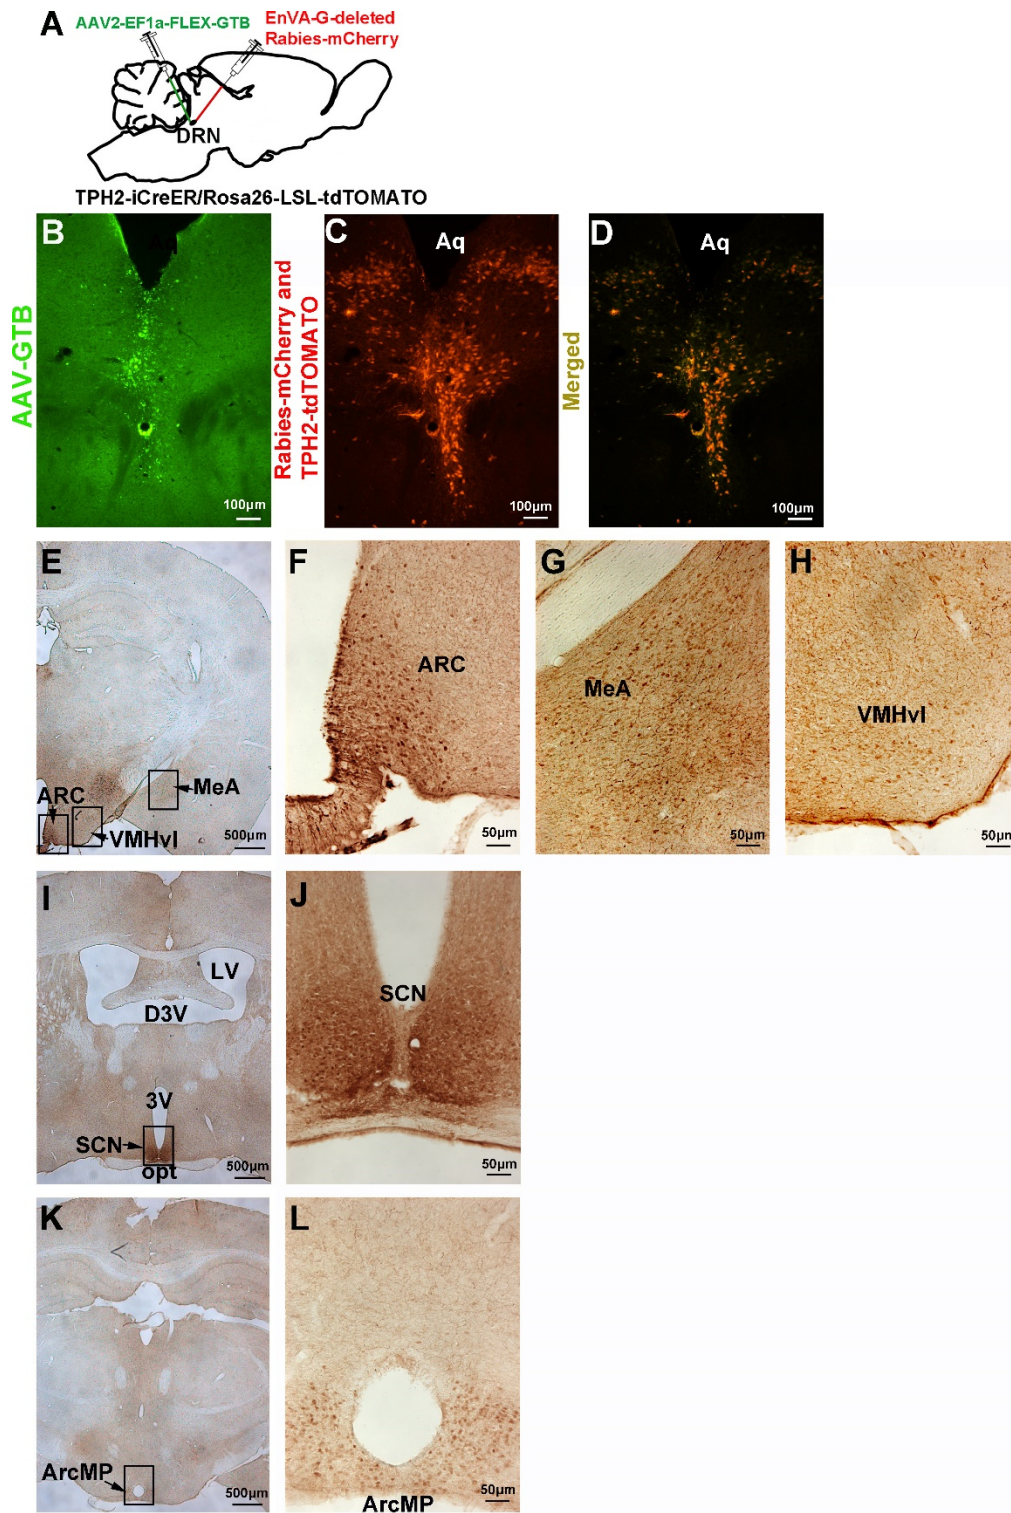

**Figure S3 (Related to Figure 2). Monosynaptic retrograde tracing from TPH2 neurons in the DRN.** (A) Schematic of the experimental strategy using the EnVA-G-deleted Rabies-mCherry virus as a monosynaptic tracer to identify the neuroanatomical inputs for TPH2<sup>DRN</sup> neurons. (B-D) Fluorescence of Enhanced green fluorescent protein + TVA + rabies B19 glycoprotein (GTB, green, B), mCherry (red, C),

and merger (D) in the DRN. **(E-L)** Immunoreactivity of mCherry (brown) in the arcuate nucleus of the hypothalamus (ARC, E and F), medial amygdala (MeA, E and G), vVMH (E and H), suprachiasmatic nucleus (SCN, I and J), and medial posterior part of the Arc (ArcMP, K and L) of female TPH2-iCreER/Rosa26-LSL-tdTOMATO mice.

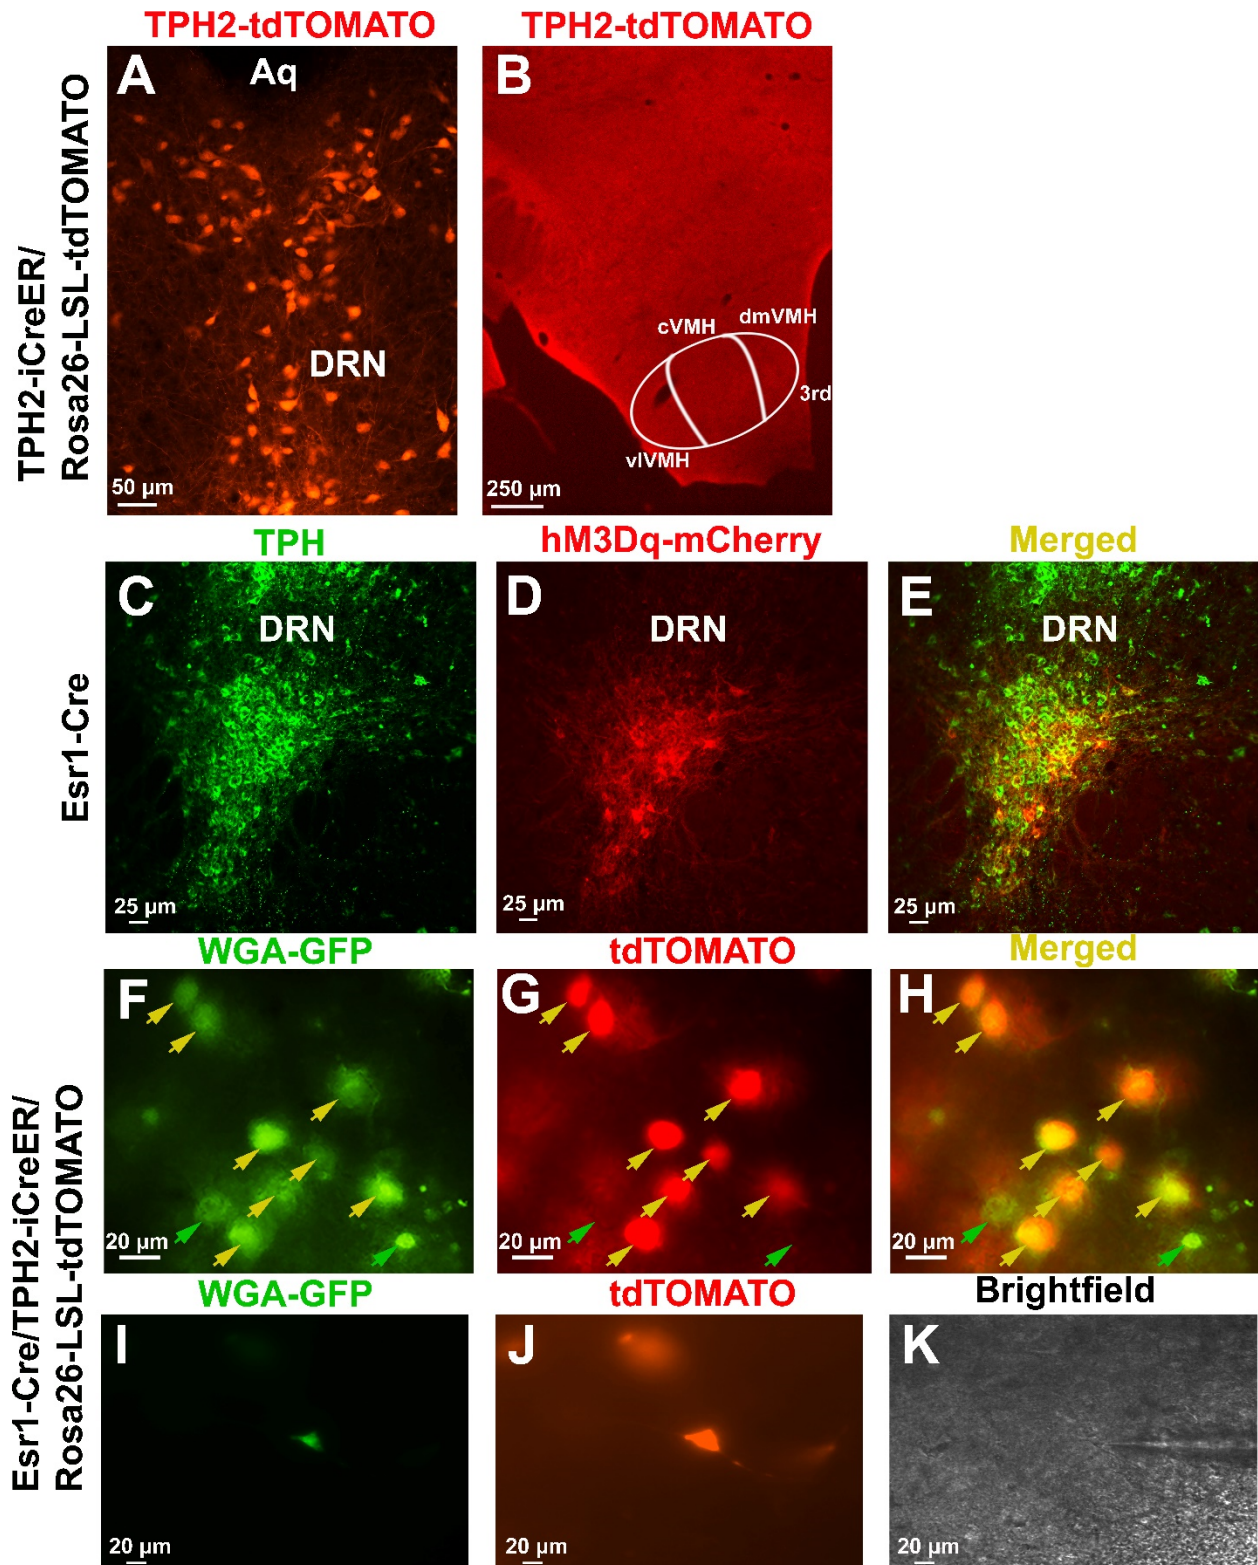

**Figure S4 (Related to Figure 3).  $ER\alpha^{DRN}$  neurons co-express 5-HT. (A-B)** tdTOMATO signals in the DRN (A) and vVMH (B) of female TPH2-iCreER/tdTOMATO mouse i.p. injected with tamoxifen (0.2 mg/g body weight). **(C-E)** Immunofluorescence staining of TPH (C), hM3Dq-mCherry (D), and merger (E) in the DRN of female Esr1-Cre mice injected with AAV-DIO-hM3Dq-mCherry virus into the DRN.

**(F-H)** Fluorescent signals of WGA-GFP (F), tdTOAMTO (G), and merger (H) in the DRN. Yellow arrows point to tdTOMATO(+)WGA-GFP(+) neurons while green arrows point to tdTOMATO(-)WGA-GFP(+) neurons. Female *Esr1-Cre/TPH2-iCreER/Rosa26-LSL-tdTOMATO* mice were injected with AAV2-DIO-ChR2-EYFP and anterograde transsynaptic tracer, Ad-iN/WED viruses, into the v1VMH. **(I-K)** Micrographic images showing a recorded yellow tdTOMATO(+)WGA-GFP(+) neuron that receives projection from  $ER\alpha^{v1VMH}$  neurons in female mice. (I) the neuron patch clamped by a micropipette visualized under the green fluorescent microscope; (J): the same neuron visualized under red fluorescence microscope; (K): the same neuron visualized under brightfield microscope. Scale bar = 20  $\mu$ m.

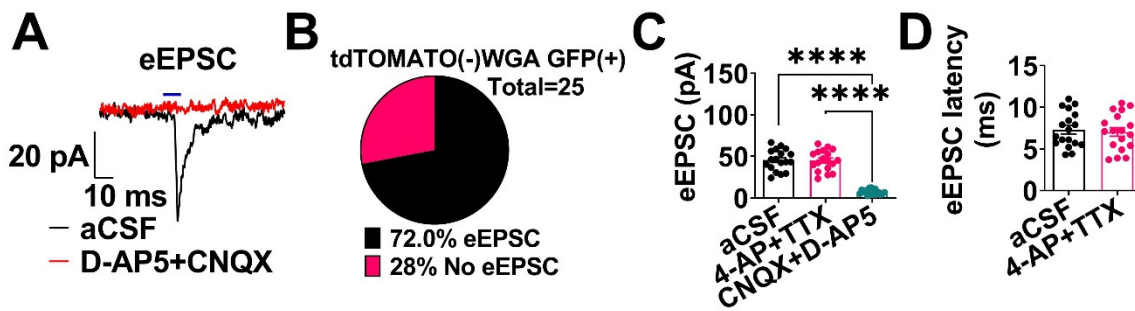

**Figure S5** (Related to Figure 3). **ER $\alpha$ <sup>vVMH</sup>→DRN neural circuit stimulates 5-HT(-)<sup>DRN</sup> neurons through glutamatergic neurotransmission.** **(A)** Representative eEPSC trace by blue light photostimulation (10 ms, 3 mW stimulation) after pre-incubation of aCSF or presynaptic inhibitors 30  $\mu$ M CNQX+30  $\mu$ M AP-5 in green tdTOMATO(-)WGA-GFP(+) neurons in the DRN. **(B)** Summary of 25 green tdTOMATO(-)WGA-GFP(+) in the DRN based on eEPSC response. **(C)** Summary of eEPSC amplitude after blue light photostimulation in the presence of aCSF, 1  $\mu$ M 4-AP+1  $\mu$ M TTX, or CNQX+D-AP5 (n = 18). **(D)** Summary of eEPSC latency after blue light photostimulation in the presence of aCSF or 4-AP+TTX (n = 18). (C) Results are presented as mean  $\pm$  SEM. \*\*\*\*, P < 0.0001 in repeated-measures ANOVA analysis followed by post hoc Dunnett tests.



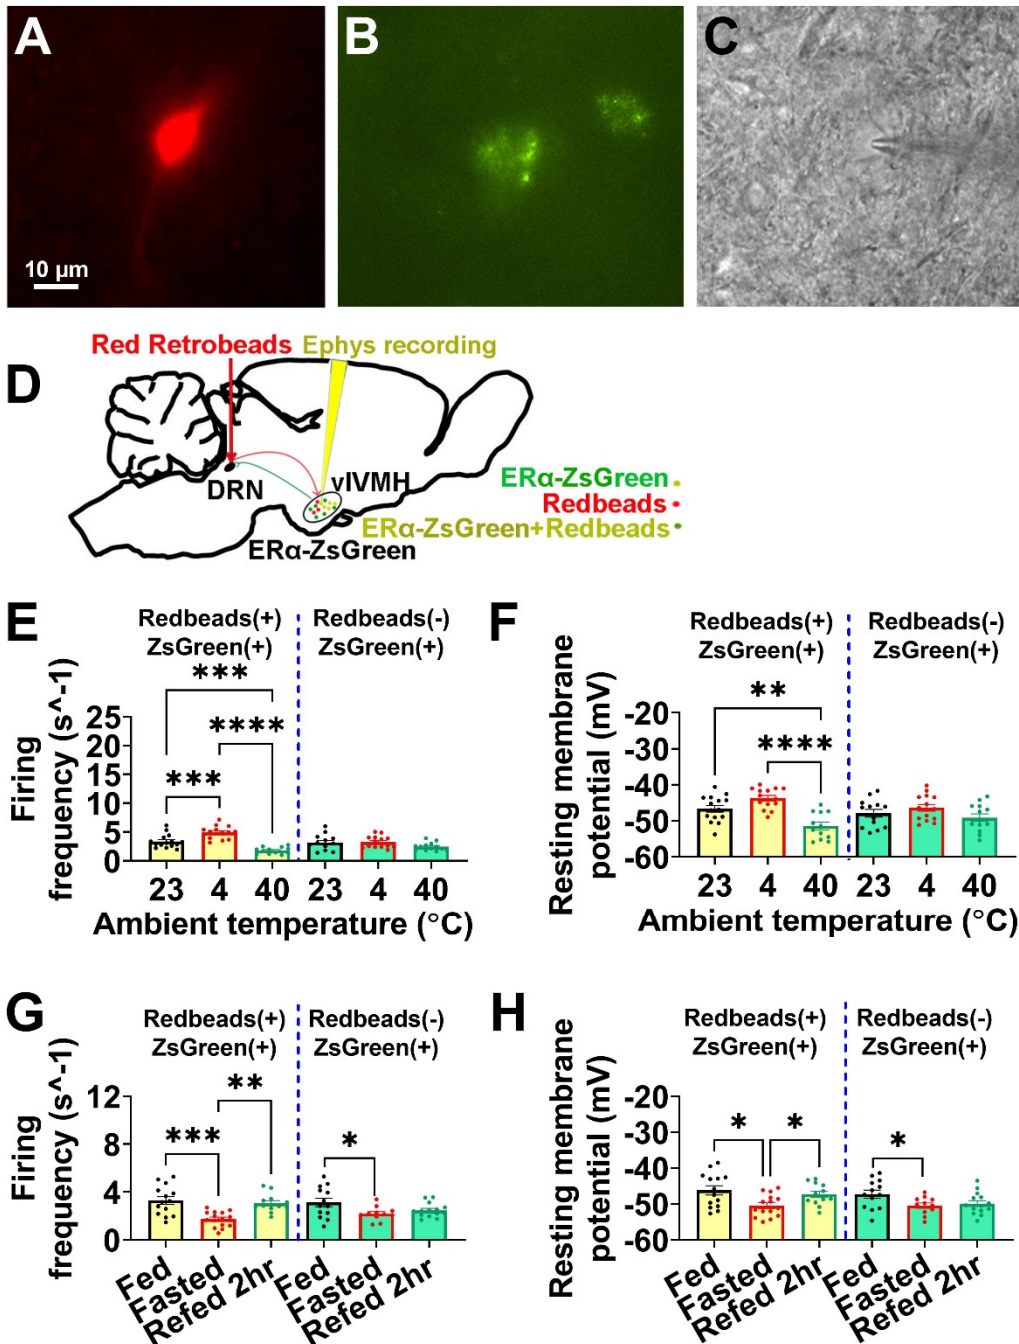

**Figure S6** (Related to Figure 4). **Neural dynamics of DRN-projecting vs. non-DRN-projecting ER $\alpha^{vIVMH}$  neurons.** **(A-C)** Micrographic images showing a recorded DRN-projecting ER $\alpha^{vIVMH}$  neurons labeled with tdTOMATO(+)/ZsGreen(+) dual yellow fluorescent colors in female mice. **(A)** Left panel: the neuron visualized under the red fluorescence microscope; **(B)** middle panel: the same neuron visualized under green fluorescence microscope; **(C)** right panel: the same neuron patch clamped by a micropipette visualized under the brightfield microscope. Scale bar = 10  $\mu$ m. **(D)** Schematic of the experimental strategy using the Red Retrobeads to label and record the electrophysiological response of DRN-projecting and non-DRN-projecting ER $\alpha^{vIVMH}$  neurons in female ER $\alpha$ -ZsGreen mice. **(E-F)** Summary of firing frequency (D)

and resting membrane potential (E) when DRN-projecting ER $\alpha^{vVMH}$  Redbeads(+)ZsGreen(+) or non-DRN-projecting ER $\alpha^{vVMH}$  Redbeads(-)ZsGreen(+) neurons exposed to different temperatures (n = 15, 14, 12, 13, 15 or 13). **(G-H)** Summary data of firing frequency (F) and resting membrane potential (G) in different metabolic conditions (n = 14, 15, 12, 13, 11 or 14). (D-E and F-G) Results are presented as mean  $\pm$  SEM. \*, P < 0.05, \*\*, P < 0.01, \*\*\*, P < 0.001, \*\*\*\*, P < 0.0001 in one way ANOVA analysis followed by post hoc Tukey's tests.

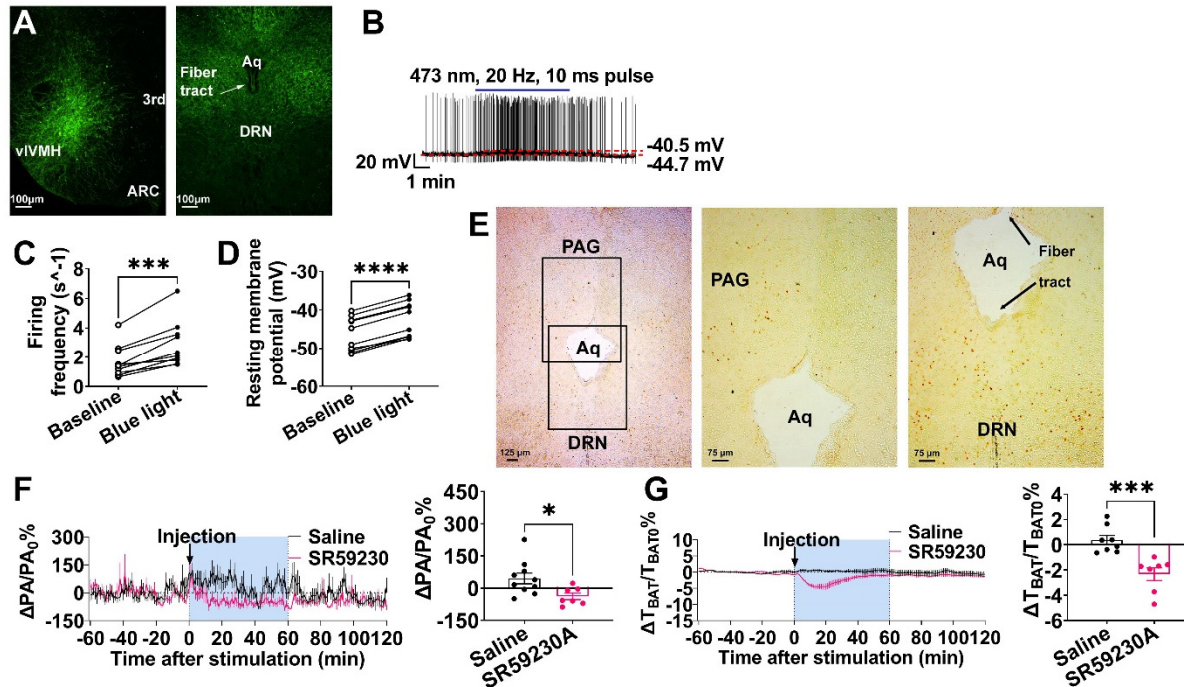

**Figure S7** (Related to Figure 5). **Validation of  $ER\alpha^{vVMH} \rightarrow DRN$  circuit activation.** **(A)** Immunofluorescence of EYFP in the vVMH and DRN of female *Esr1-Cre* mice with AAV-DIO-ChR2-EYFP injected into the vVMH and light fiber implanted into the DRN. **(B)** The electrophysiological responses of vVMH EYFP-positive yellow neurons to blue light photostimulation in the vVMH (20 Hz, 10 ms/pulse, 3 mW constant stimulation for 6 minutes) in female mice. **(C-D)** Summary of firing frequency (C) and resting membrane potential (D) before and after blue light stimulation ( $n = 10$ ). **(E)** Post-hoc staining of cFOS on the DRN and the periaqueductal grey (PAG) samples after yellow/blue light photostimulation in the DRN (20 Hz, 10ms pulses, 3 mW constant stimulation for 5 minutes). **(F)** Effects of saline or SR59230 (0.5 mg/kg) i.p. injection on physical activity change ( $PA_0$  represents average physical activity 1 hour before injection,  $\Delta PA$  represents physical activity recording  $- PA_0$ ) during 3-hrs recording (left panel) and average of physical activity change during 1 hour after i.p. injections (right panel). ( $n = 10$  and 7). Female *Esr1-Cre* mice were injected with AAV-DIO-ChR2-EYFP virus into the vVMH. Mice were given 1-hr yellow light stimulation (589 nm, 10 ms/pulse, 20 Hz, 3 s on and 2 s off for 1 h) right after the i.p. injections. **(G)** Effects of saline or SR59230 i.p. injection on BAT temperature change ( $T_{BAT0}$  represents average BAT temperature 1 hour before injection,  $\Delta T_{BAT}$  represents BAT temperature recording  $- T_{BAT0}$ ) during 3-hrs recording (left panel) and average of BAT temperature change during 1 hour after i.p. injections (right panel). ( $n = 10$  and 7). (C-D) Data are presented for each cell. \*\*\*,  $P < 0.001$ , \*\*\*\*,  $P < 0.0001$  in paired t-tests. (E-F) Results are shown as mean  $\pm$  SEM. \*,  $P < 0.05$ , \*\*\*,  $P < 0.001$  in unpaired t-tests.

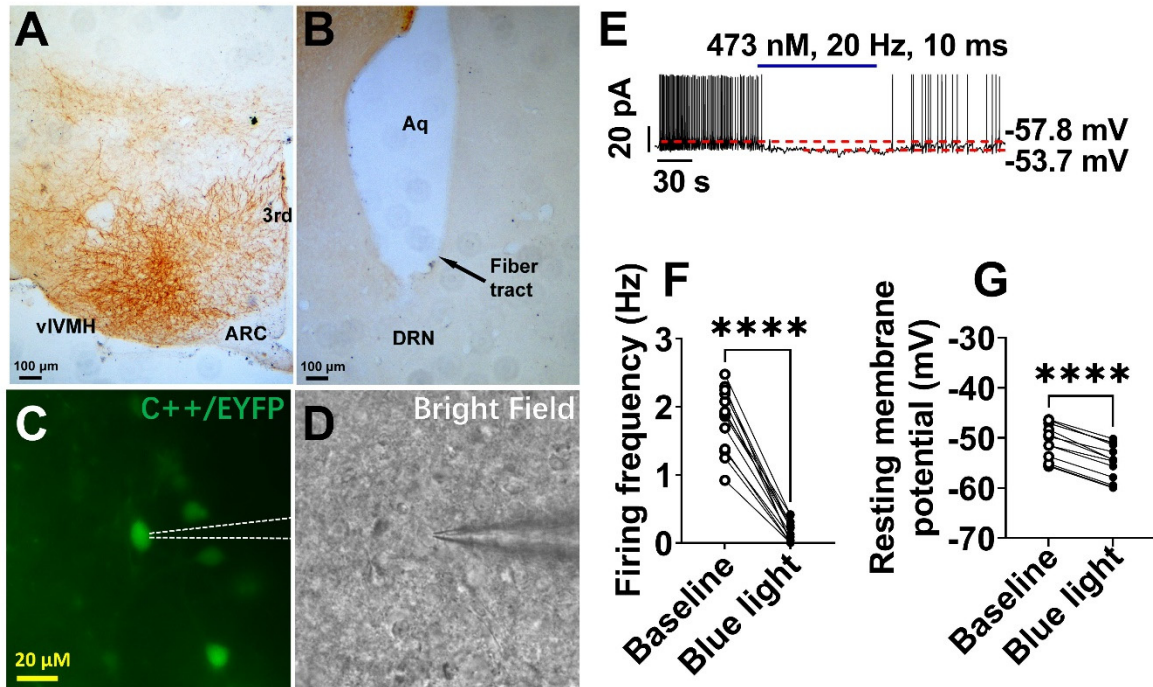

**Figure S8** (Related to Figure 5). **Validation of ER $\alpha$ <sup>vVMH</sup>→DRN circuit inhibition.** **(A-B)** Immunohistochemistry staining of EYFP in the vVMH (A) and DRN (B) of female *Esr1-Cre* mice with AAV-DIO-iC<sup>++</sup>-EYFP injected into the vVMH and light fiber implanted into the DRN. **(C-D)** Micrographic images showing a recorded C<sup>++</sup>/EYFP (+) neurons in the vVMH of female *Esr1-Cre* mice. Left panel (C): the neuron visualized under the green fluorescence microscope; right panel (D): the same neuron patch clamped by a micropipette visualized under the brightfield microscope. Scale bar = 20  $\mu$ m. **(E)** The electrophysiological responses of vVMH EYFP-positive neurons to blue light photostimulation in the vVMH (20 Hz, 10 ms/pulse, 3 mW constant stimulation for 3 minutes). **(F-G)** Summary of firing frequency (F) and resting membrane potential (G) before and after blue light stimulation (n = 13). (F-G) Data are presented for each cell. \*\*\*\*, P < 0.0001 in paired t-tests.

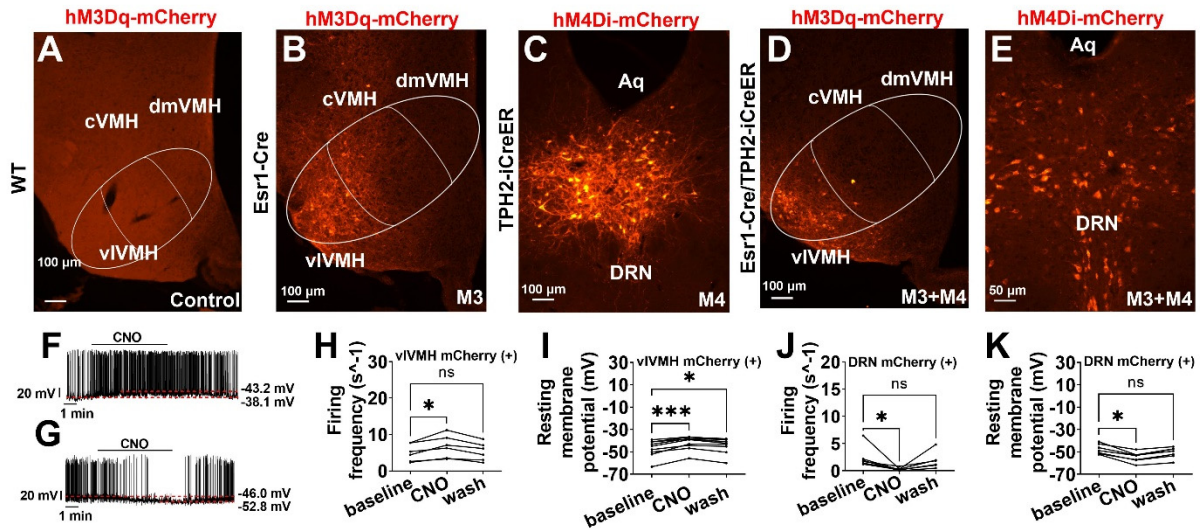

**Figure S9** (Related to Figure 6). **Validation of  $ER\alpha^{vVMH}$  activation and of  $5-HT^{DRN}$  inhibition by dual DREADD.** **(A-E)** Fluorescence of mCherry in the vVMH of female WT mice injected with AAV-DIO-hM3Dq-mCherry virus into the vVMH (A, Control), the vVMH of female Esr1-Cre mice injected with AAV-DIO-hM3Dq-mCherry virus into the vVMH (B, M3), the DRN of female TPH2-iCreER mice injected with AAV-DIO-hM4Di-mCherry virus into the DRN (C, M4), or the vVMH and DRN of female Esr1-Cre/TPH2-iCreER mice injected with AAV-DIO-hM3Dq-mCherry virus into the vVMH and AAV-DIO-hM4Di-mCherry virus into the DRN (D-E, M3+M4). **(F-G)** Representative traces of mCherry (+) cells in the vVMH (F) and DRN (G) of female M3 + M4 mice before and after CNO treatment (5  $\mu$ M). **(H-I)** Summary of firing frequency (H,  $n = 6$ ) and resting membrane potential (I,  $n = 9$ ) in mCherry (+) cells in the vVMH before and after CNO treatment. **(J-K)** Summary of firing frequency (J,  $n = 6$ ) and resting membrane potential (K,  $n = 7$ ) in mCherry (+) cells in the DRN before and after CNO treatment. (H-K) Data are presented for each cell. \*,  $P < 0.05$ , \*\*\*,  $P < 0.001$  in repeated-measures ANOVA analysis followed by post hoc Dunnett tests.

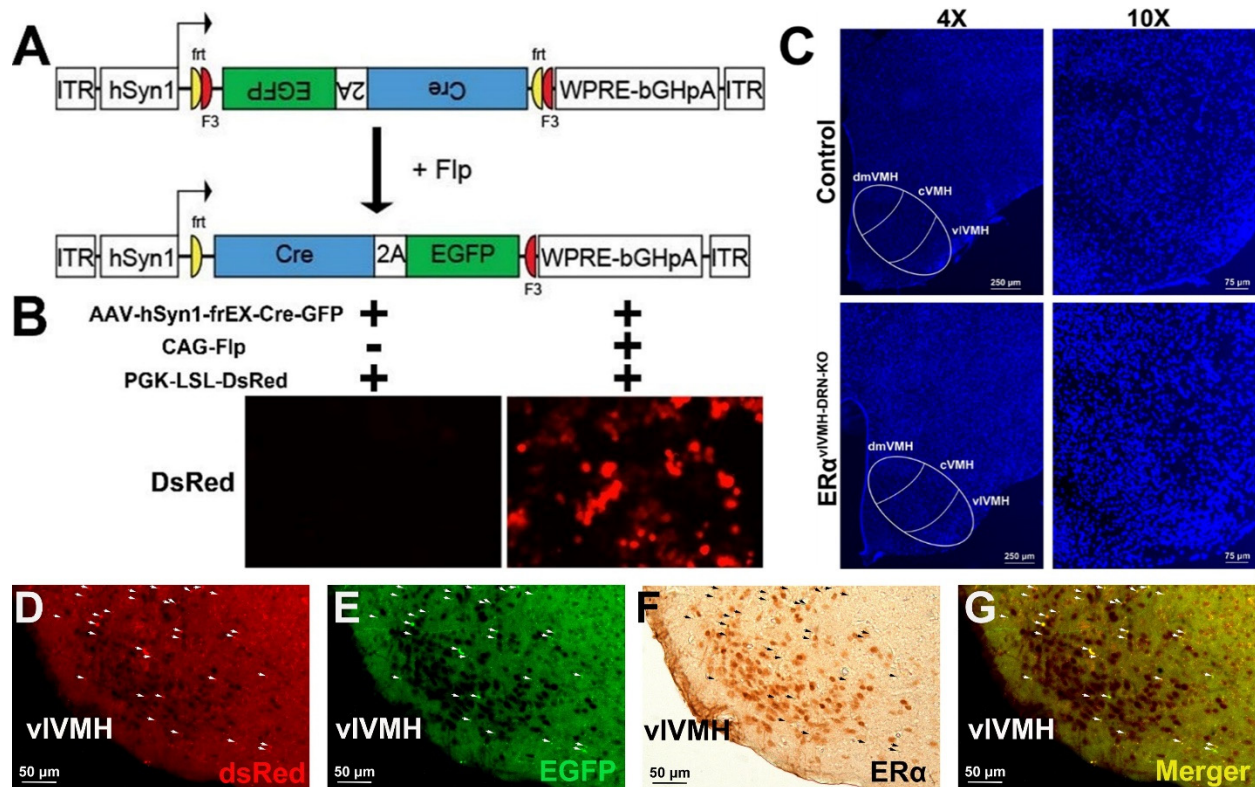

**Figure S10** (Related to Figure 7). **Retrograde deletion of ER $\alpha$ .** **(A)** Schematic representation of Cre-EGFP-expressing AAV construct employing the fDIO (double firted inverse orientation) systems (AAV-hSyn1-frEX-Cre-GFP). ITR; inverted terminal repeats. hSyn1; human synapsin promoter 1. WPRE; woodchuck post-transcriptional regulatory element. bGHpA; bovine growth hormone poly(A) sequence. **(B)** Fluorescence of DsRed in HEK293 cells transfected with AAV-hSyn1-frEX-Cre-GFP + PGK-LSL-DsRed, or AAV-hSyn1-frEX-Cre-GFP + PGK-LSL-DsRed + CAG-Flpe. **(C)** DAPI staining in the v1VMH of female control and ER $\alpha^{\text{v1VMH-DRN-KO}}$  mice. **(D-G)** Expression of dsRed (D), EGFP (E), ER $\alpha$  (F), and merger (dsRed+EGFP, G) in the v1VMH of ER $\alpha^{\text{v1VMH-DRN-KO}}$  mice.

## KEY RESOURCES TABLE

| REAGENT or RESOURCE                                                                  | SOURCE                                                             | IDENTIFIER                        |
|--------------------------------------------------------------------------------------|--------------------------------------------------------------------|-----------------------------------|
| Antibodies                                                                           |                                                                    |                                   |
| Anti-Wheat germ agglutinin antibody                                                  | Vector Laboratories                                                | Cat# AS2024, RRID:AB_2315609      |
| Donkey anti-Goat IgG (H+L) Cross-Adsorbed Secondary Antibody, Alexa Fluor 488        | Thermo Fisher Scientific                                           | Cat# A-11055, RRID:AB_2534102     |
| 5-HT (Serotonin) Rabbit Antibody                                                     | ImmunoStar                                                         | Cat# 20080, RRID:AB_572263        |
| Goat anti-Rabbit IgG (H+L) Highly Cross-Adsorbed Secondary Antibody, Alexa Fluor 594 | Thermo Fisher Scientific                                           | Cat# A-11037, RRID:AB_2534095     |
| Living Colors® DsRed Polyclonal Antibody                                             | Takara Bio                                                         | Cat# 632496, RRID:AB_10013483     |
| Biotin-SP-AffiniPure Fab Fragment Donkey Anti-Rabbit IgG (H+L) antibody              | Jackson ImmunoResearch Labs                                        | Cat# 711-067-003, RRID:AB_2340595 |
| VECTASTAIN Elite ABC-Peroxidase Kit                                                  | Vector Laboratories                                                | Cat# PK-6100, RRID:AB_2336819     |
| Anti-Estrogen Receptor alpha antibody                                                | Millipore                                                          | Cat# 06-935, RRID:AB_310305       |
| Green Fluorescent Protein (GFP) Antibody                                             | Aves Labs                                                          | Cat# GFP-1020, RRID:AB_10000240   |
| cFos (9F6) Rabbit mAb antibody                                                       | Cell Signaling Technology                                          | Cat# 2250, RRID:AB_2247211        |
| DsRed (E-8) Alexa Fluor 594                                                          | Santa Cruz Biotechnology                                           | Cat# sc-390909, RRID:AB_2801575   |
| Sheep Anti-Tryptophan Hydroxylase Polyclonal antibody, Unconjugated                  | Millipore                                                          | Cat# AB1541, RRID:AB_90754        |
| Bacterial and Virus Strains                                                          |                                                                    |                                   |
| pAAV-hSyn-DIO-hM3D(Gq)-mCherry                                                       | The Vector Core at the University of North Carolina at Chapel Hill | RRID:Addgene_44361                |
| pAAV-hSyn-DIO-hM4D(Gi)-mCherry                                                       | The Vector Core at the University of North Carolina at Chapel Hill | RRID:Addgene_44362                |
| pAAV-EF1a-DIO-hChR2(H134R)-P2A-EYFP                                                  | The Vector Core at the University of North Carolina at Chapel Hill | RRID:Addgene_139283               |
| pAAV-EF1a-DIO iC++-eYFP                                                              | The Vector Core at the University of North Carolina at Chapel Hill | N/A                               |
| CAV2-Cre                                                                             | Montpellier vector platform                                        | N/A                               |
| Ad-iN/WED                                                                            | Martin Myers                                                       | N/A                               |
| AAV2-EF1a-FLEX-GT                                                                    | Viral Vector Core - Salk Institute for Biological Studies          | RRID:Addgene_26198                |
| AAV2-EF1a-FLEX-GTB                                                                   | Viral Vector Core - Salk Institute for Biological Studies          | RRID:Addgene_26197                |
| EnVA-G-deleted Rabies-mCherry                                                        | Viral Vector Core - Salk Institute for Biological Studies          | N/A                               |

|                                                                                    |                                                                    |                                   |
|------------------------------------------------------------------------------------|--------------------------------------------------------------------|-----------------------------------|
| ΔG Rabies FLPO-dsRedXpress                                                         | Viral Vector Core - Salk Institute for Biological Studies          | N/A                               |
| AAV-hSyn1-frEX-Cre-GFP                                                             | Yong Xu                                                            | N/A                               |
| AAV2-CMV-GFP                                                                       | The Vector Core at the University of North Carolina at Chapel Hill | RRID:Addgene_49055                |
| Chemicals, Peptides, and Recombinant Proteins                                      |                                                                    |                                   |
| CNQX                                                                               | Tocris.inc                                                         | Cat# 0190                         |
| 17β-Estradiol                                                                      | MedChem Express                                                    | Cat# HY-B0141                     |
| Clozapine N-oxide                                                                  | MedChem Express                                                    | Cat# HY-17366                     |
| SR59230A                                                                           | Millipore&Sigma                                                    | Cat# S8688                        |
| tetrodotoxin                                                                       | R&D system                                                         | Cat# 1078                         |
| (+)-Bicuculline                                                                    | Tocris.inc                                                         | Cat# 0130                         |
| D-AP5                                                                              | Tocris.inc                                                         | Cat# 0106                         |
| Red Retrobeads                                                                     | Lumafluor.inc                                                      | Red Retrobeads™ IX                |
| Experimental Models: Organisms/Strains                                             |                                                                    |                                   |
| Mouse: Rosa26-LSL-tdTOMATO: B6.Cg-Gt(ROSA)26Sor <sup>tm14(CAG-tdTomato)Hze/J</sup> | Jackson Laboratory                                                 | Cat# 007914, RRID:IMSR_JAX:007914 |
| Mouse: Esr1 <sup>lox/lox</sup> : ERαfl/fl                                          | Sohaib A. Khan                                                     | N/A                               |
| Mouse: ERα-ZsGreen                                                                 | Yong Xu                                                            | N/A                               |
| Mouse: Esr1-Cre: B6N.129S6(Cg)-Esr1tm1.1(cre)And/J                                 | Jackson Laboratory                                                 | Cat# 017911, RRID:IMSR_JAX:017911 |
| Mouse: TPH2-iCreER: STOCK Tg(Tph2-icre/ERT2)6Gloss/J                               | Jackson Laboratory                                                 | Cat# 016584, RRID:IMSR_JAX:016584 |
| Recombinant DNA                                                                    |                                                                    |                                   |
| Cre Shine                                                                          | Addgene                                                            | RRID:Addgene_37404                |
| pCAG-Flpe                                                                          | Addgene                                                            | RRID:Addgene_13787                |
| Software and Algorithms                                                            |                                                                    |                                   |
| pClamp 10.3 software                                                               | Molecular Devices                                                  | N/A                               |
| Vitalview® Telemetry software                                                      | STARR Life Sciences                                                | N/A                               |
| GraphPad Prsim 9                                                                   | GraphPad                                                           | N/A                               |
